# Supplementary material for: Anabolic Sensitivity in Healthy, Lean, Older Men Is Associated With Higher Expression of Amino Acid Sensors and mTORC1 Activators Compared to Young
Source: PubMed Central journal article supplement (PMC11670179; doi:10.1002/jcsm.13613), 2024-11-19

### Cytosolic fraction

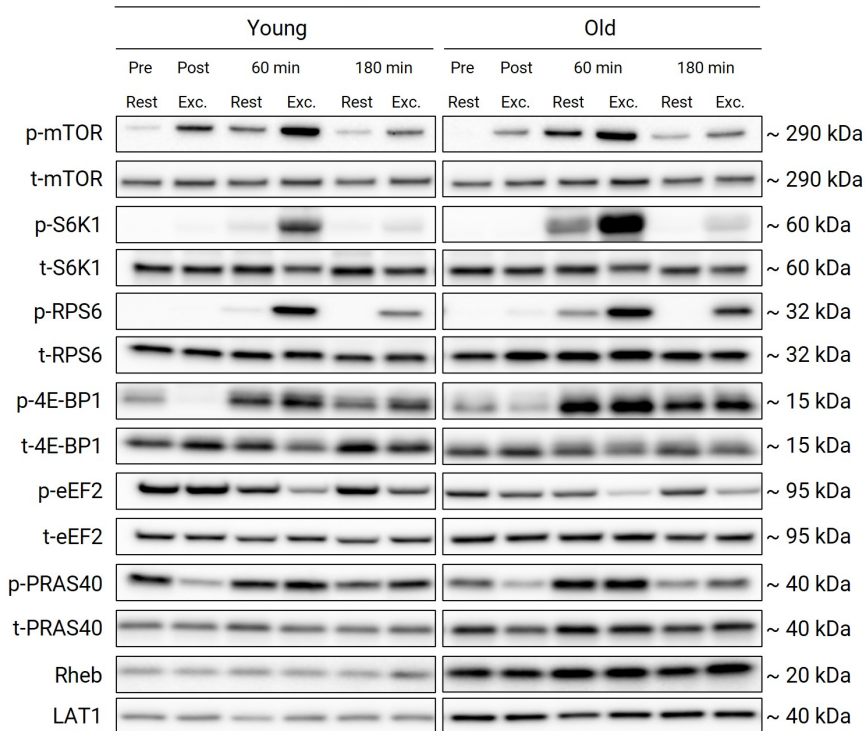

### Lysosomal fraction

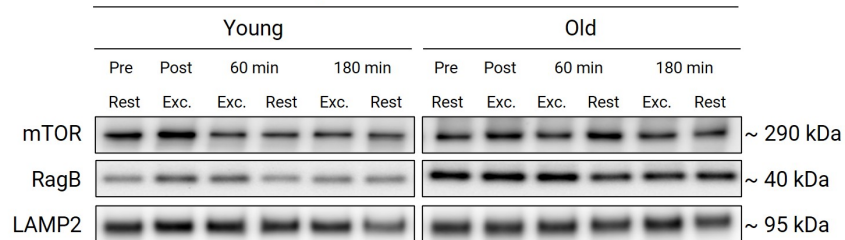

#### Fraction purity

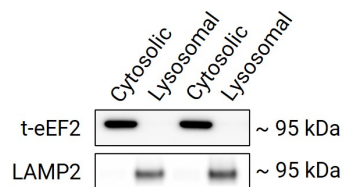

#### Total protein stain (memcode)

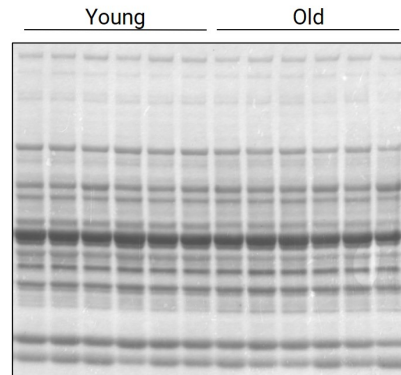

Supplement: JCSM-16-e13613-s004.pdf [file JCSM-16-e13613-s004.pdf]
